# Supplementary figures and images for: Treatment for Complex Elbow Fractures Involving Both a Hinged External Fixator and Internal Fixation
Source: Research Square preprint supplement (doi:10.21203/rs.3.rs-472685/v1), 2021-05-17

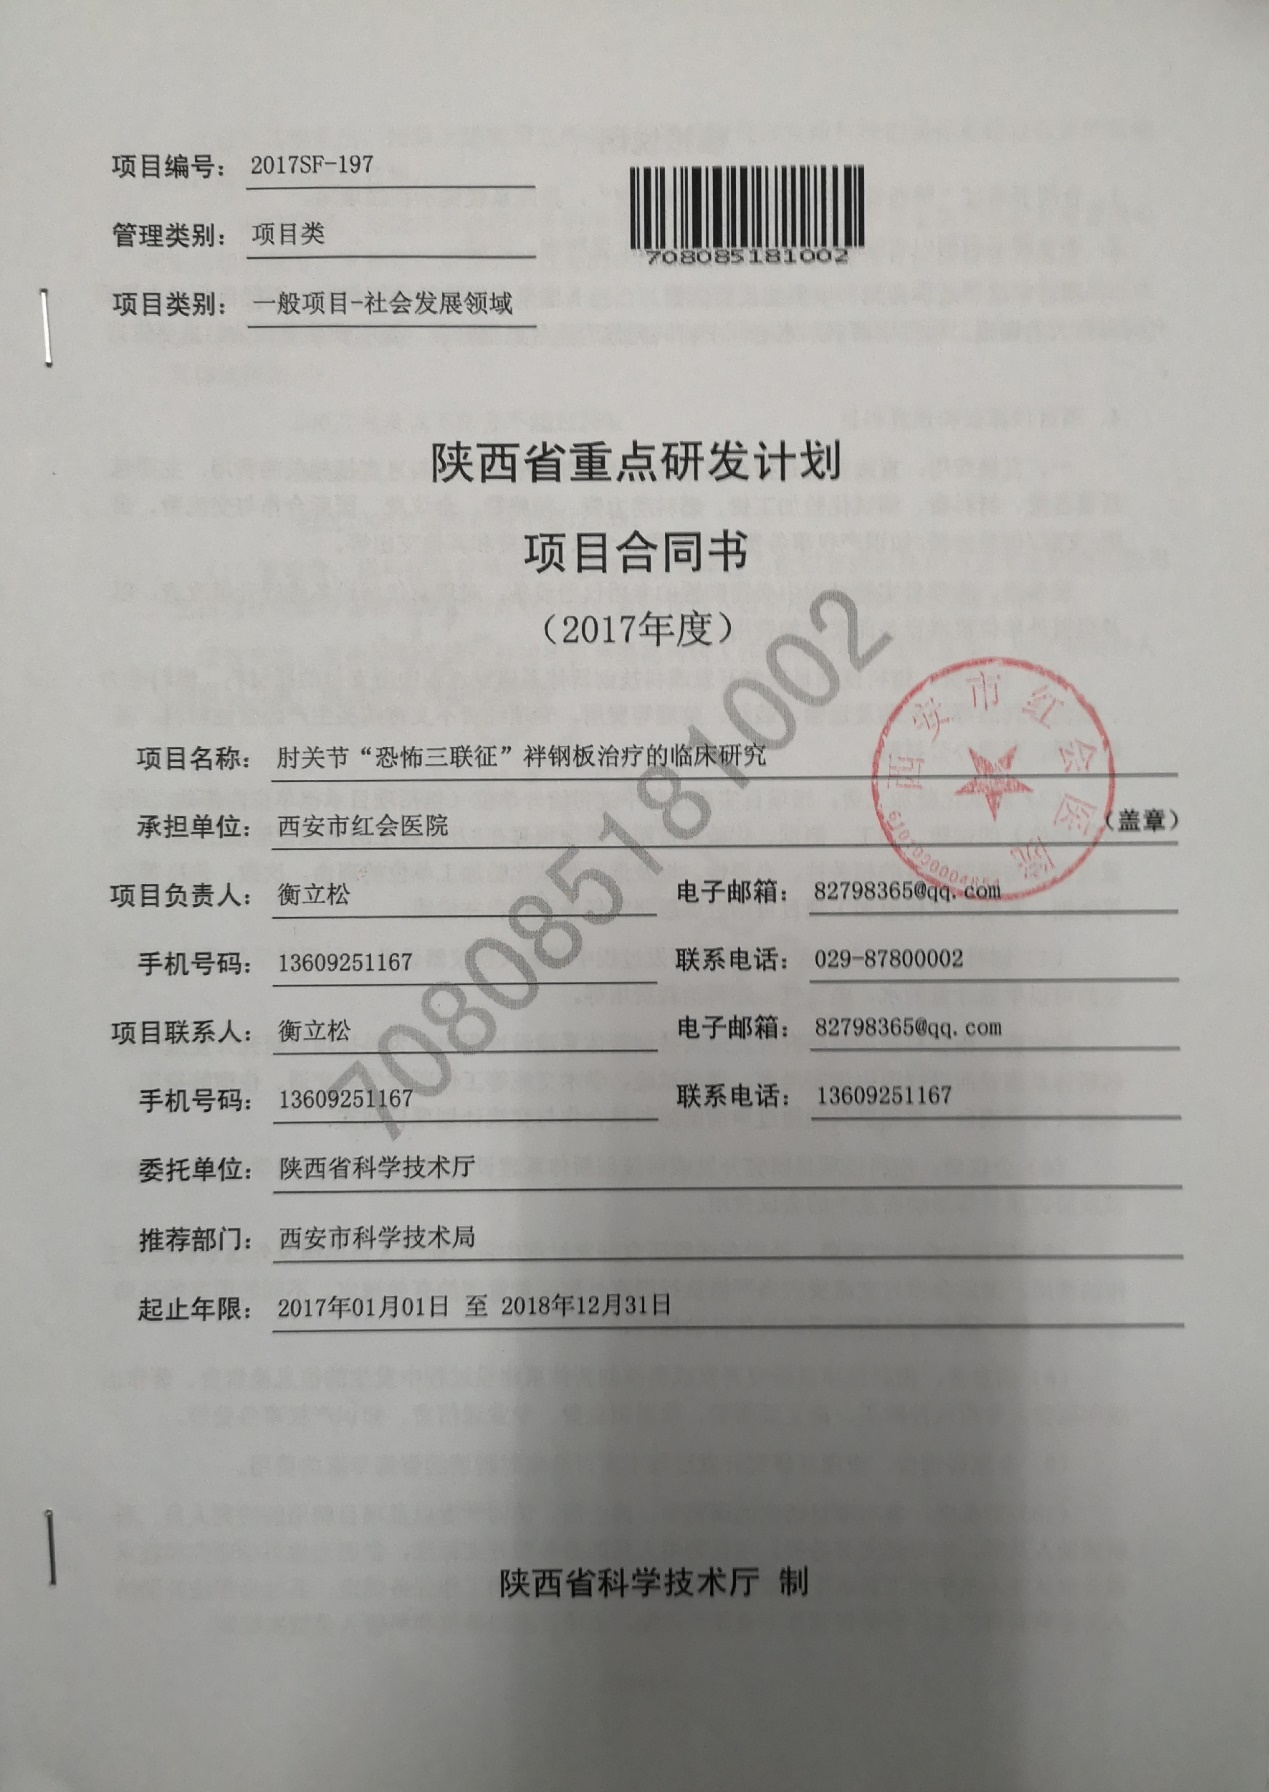


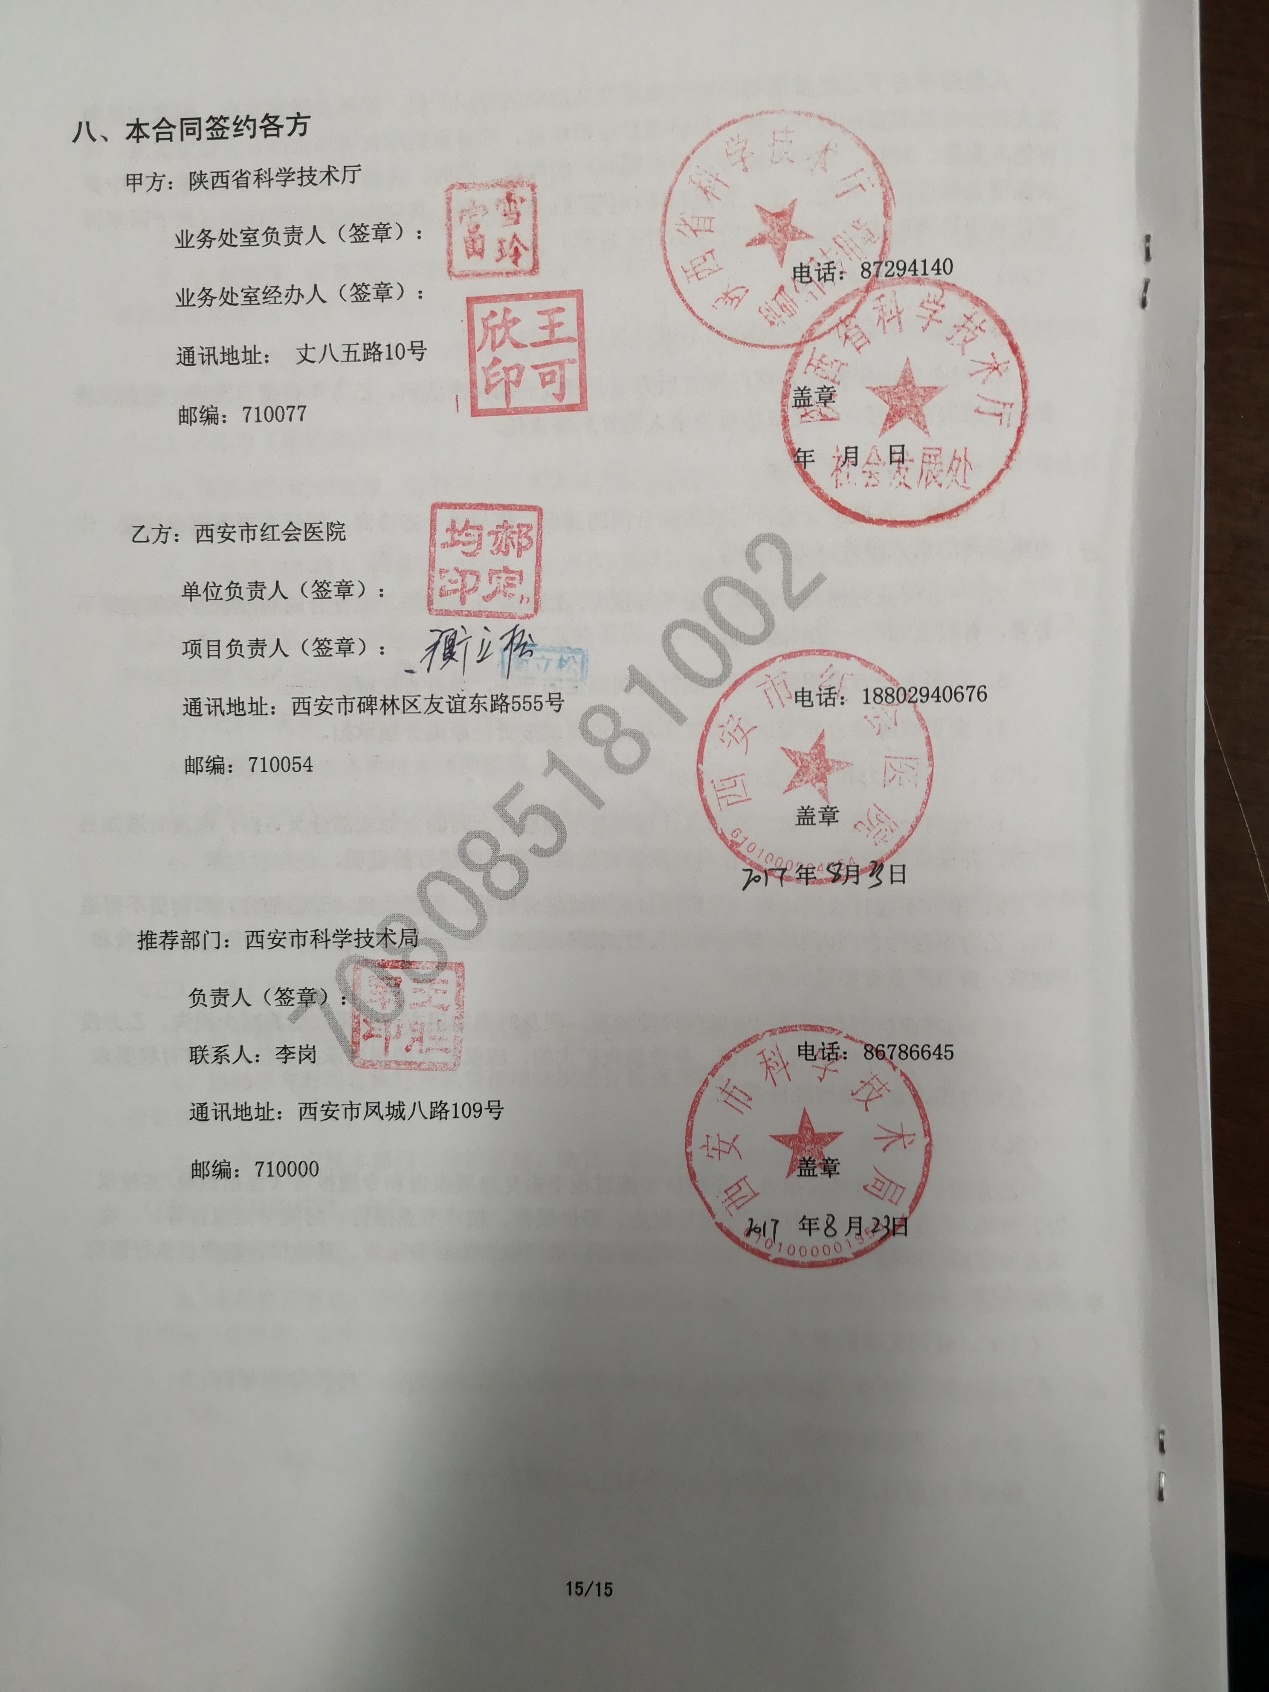


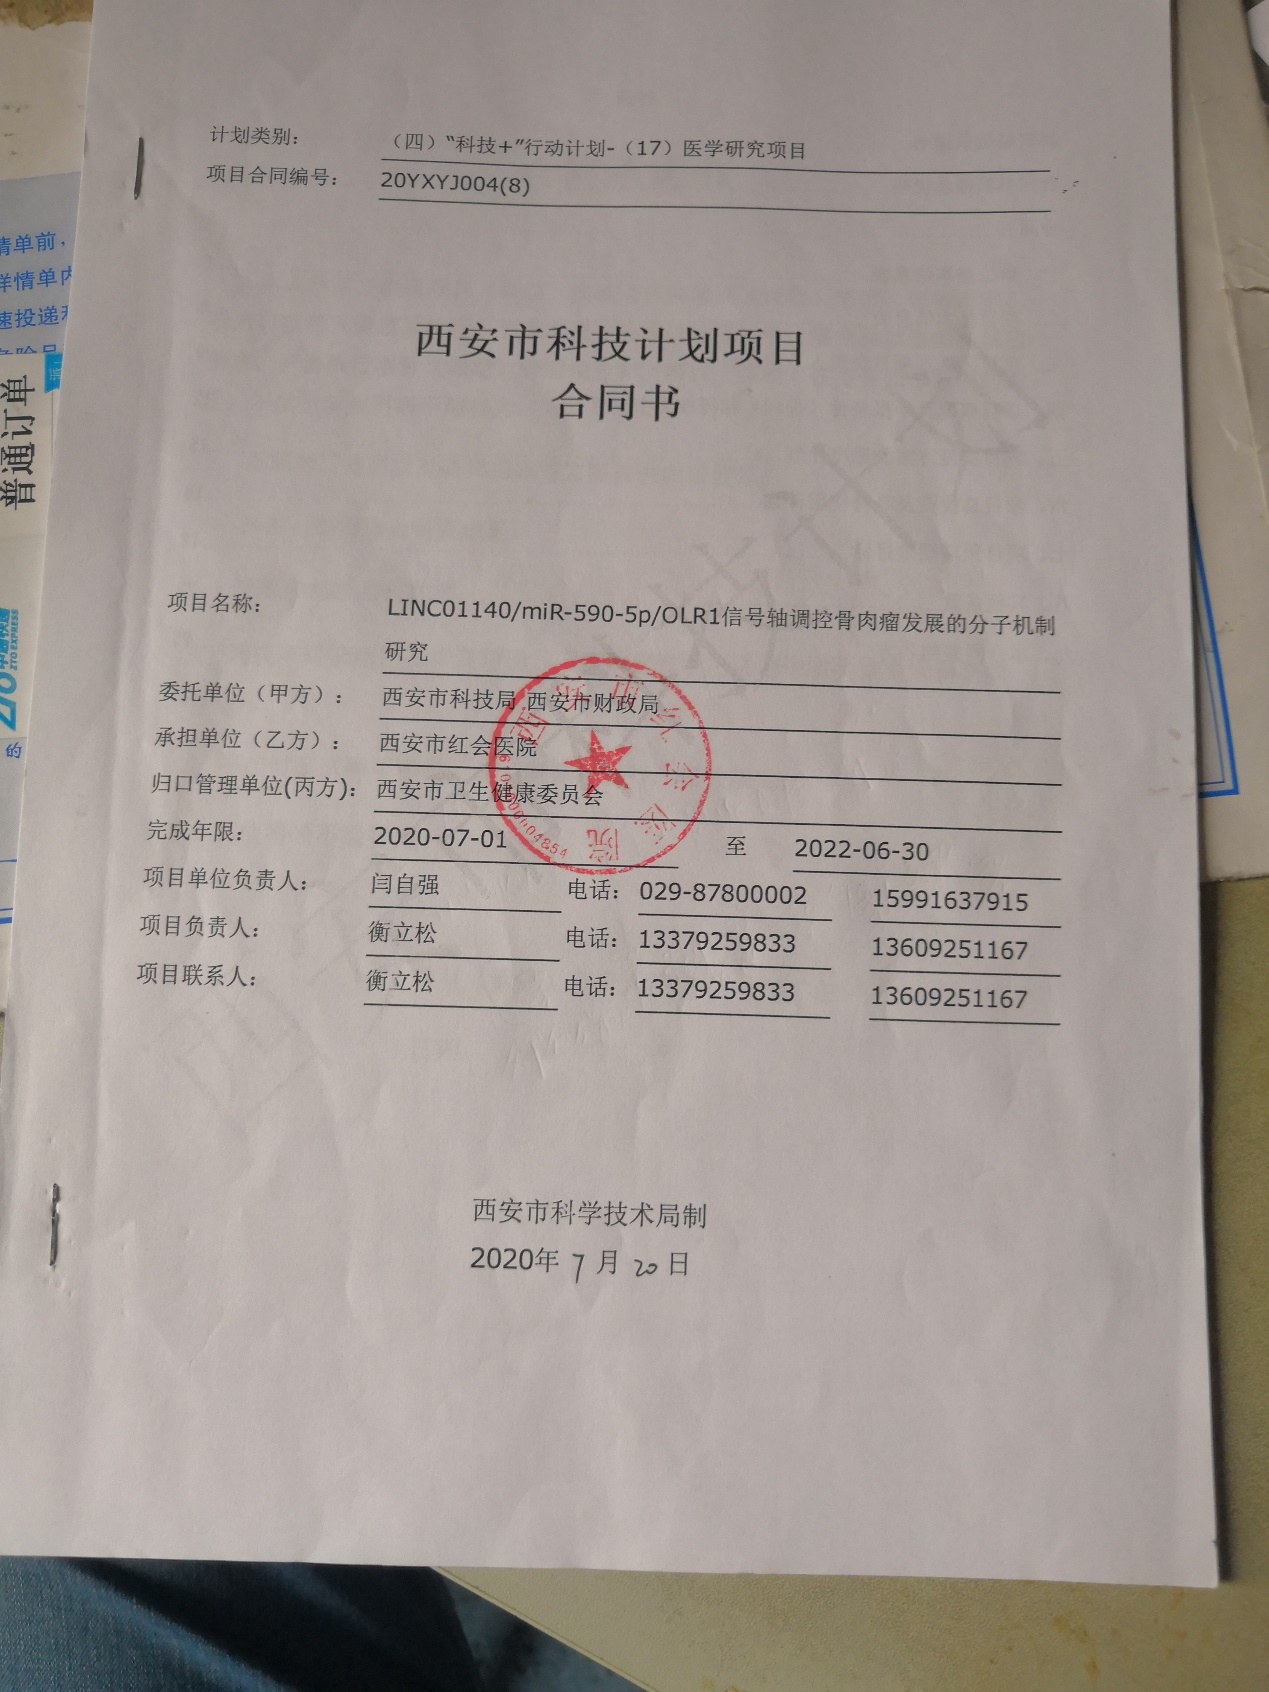


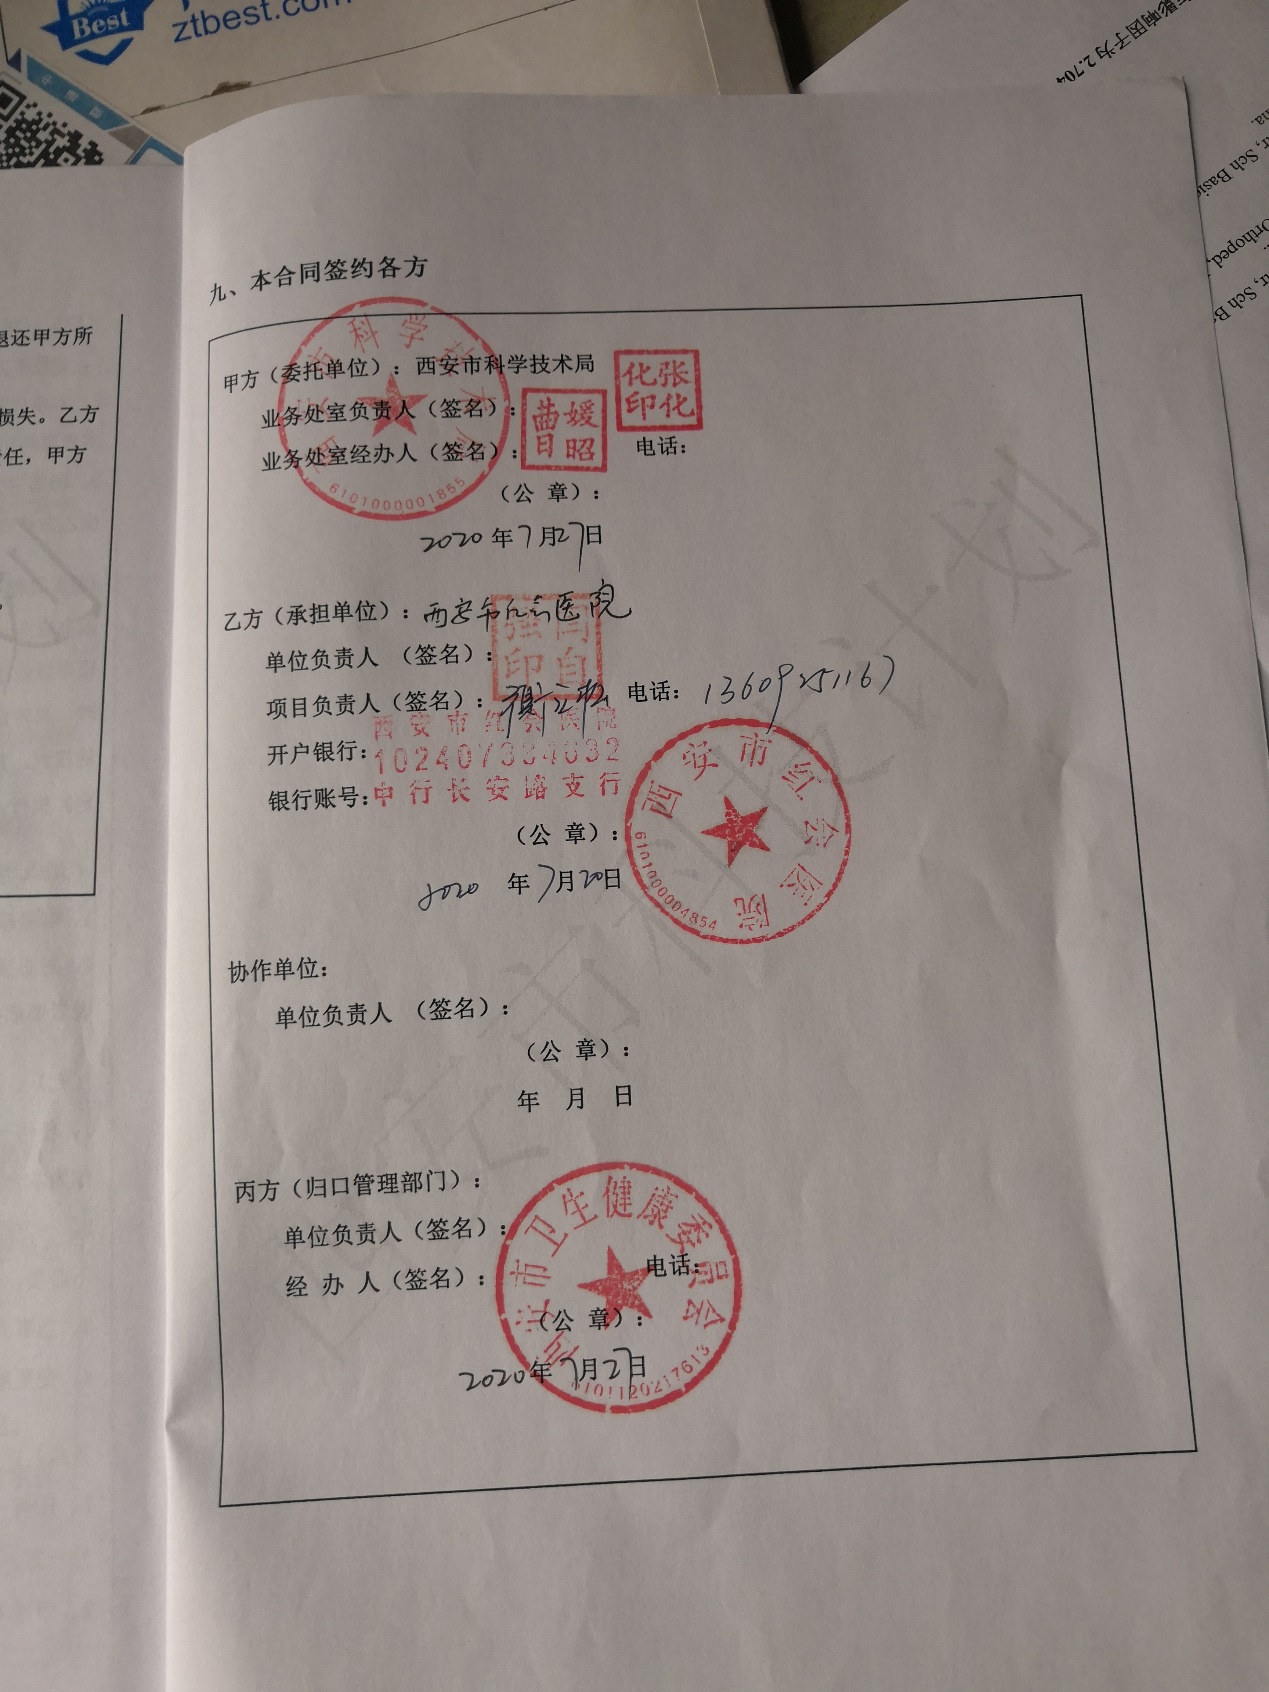

Supplement: Supplementary file 1 [file 82500474ddeaf45c8818cd4a.docx]
